# Supplementary material for: The in vivo mechanics of the magnetotactic backbone as revealed by correlative FLIM-FRET and STED microscopy
Source: PubMed Central journal article supplement (PMC6928011; doi:10.1038/s41598-019-55804-5), 2019-12-23
Supplement: 41598_2019_55804_MOESM1_ESM.pdf [file 41598_2019_55804_MOESM1_ESM.pdf]

1 The *in vivo* mechanics of the magnetotactic backbone  
2 as revealed by correlative FLIM-FRET and STED  
3 microscopy

4 Erika Günther<sup>1</sup>, André Klauß<sup>2,4</sup>, Mauricio Toro-Nahuelpan<sup>3,5</sup>, Dirk Schüler<sup>3</sup>, Carsten Hille<sup>2,6</sup>,  
5 Damien Faivre<sup>1,7,\*</sup>

6 <sup>1</sup>Department of Biomaterials, Max Planck Institute of Colloids and Interfaces, Science Park Golm, 14424  
7 Potsdam, Germany

8 <sup>2</sup>Physical Chemistry, Institute of Chemistry, University of Potsdam, 14476 Potsdam, Germany

9 <sup>3</sup>Department of Microbiology, University Bayreuth, 95447 Bayreuth, Germany

10 <sup>4</sup>Present address: HOLOEYE Photonics AG, 12489 Berlin, Germany

11 <sup>5</sup>Present address: European Molecular Biology Laboratory, 69117 Heidelberg, Germany

12 <sup>6</sup>Present address: Technical University of Applied Sciences Wildau, 15745 Wildau, Germany

13 <sup>7</sup>Aix Marseille University, CEA, CNRS, BIAM, 13108 Saint Paul-Lez-Durance, France

14 \* e-mail: [damien.faivre@mpikg.mpg.de](mailto:damien.faivre@mpikg.mpg.de).

## 15 **Supplementary information**

### 16 **Control experiments**

17 We acquired two consecutive FLIM-FRET and STED images of the same cells. First, we verified  
18 changes in distance between MamJ-phiYFP and TagRFP657-MamK using FLIM-FRET and in the  
19 structure of the filament of TagRFP657-MamK by STED microscopy. The bacteria are embedded  
20 in an agarose matrix to keep them alive, but also to prevent them from being able to freely move  
21 and in particular rotate. We performed FLIM-FRET and STED microscopy on a bacterium and  
22 after 20 min regeneration period, the same procedure was repeated on the same cell. Supplementary  
23 Figure 2a shows the STED image of three cells (TagRFP675-MamK filaments). Supplementary  
24 Figure 2b shows the identical cells after 20 min regeneration period. Both images display consistent  
25 and straight filaments.

26 In addition, using equation (1), we calculated the FRET efficiency at the beginning of the  
27 experiment  $E = 78 \pm 5\%$  ( $n = 14$  cells,  $N = 10$  images, 2 independent experiments / imaging of  
28 different cultures and at different days). After 20 min regeneration period, the FRET efficiency is  
29  $E = 82 \pm 3\%$  ( $n = 13$  cells,  $N = 10$  images, 2 independent experiments). The calculated distance  
30 between the donor phiYFP and acceptor TagRFP657 using equation (4) is  $r = 3.7 \pm 0.2$  nm ( $n = 14$ ,  
31  $N = 10$ ) and  $r = 3.4 \pm 0.2$  nm ( $n = 13$ ,  $N = 10$ ) for the repeated measurement after 20 min. The  
32 FLIM-FRET results demonstrate that the distance of MamJ-phiYFP and TagRFP657-MamK  
33 change slightly during STED imaging and the 20 min regeneration period in a range of  
34  $\Delta r = 0.3$  nm, which is statistically significant ( $P < 0.01$ ), but physiologically not relevant.  
35 Additionally, the STED images of the TagRFP657-MamK filament are similar (see also  
36 Supplementary Figure S2).

37

## 38 **Measured fluorescence decay times, calculated FRET efficiencies and donor-acceptor** 39 **distances**

40 We measured the fluorescence decay time ( $\tau$ ) of the donor phiYFP in presence and absence of the  
41 acceptor TagRFP657 by time-correlated single-photon counting (TCSPC). Decay curves from  
42 MamJ-phiYFP strains were successfully fitted ( $\chi_R^2 = 1.28$ ) to a single-exponential decay function  
43 with a resulting decay time  $\tau_D = 2.95$  ns. Decay curves of MamJ-phiYFP + TagRFP657-MamK  
44 strains show a faster decay compared to the MamJ-phiYFP strains. We quantified this decay  
45 behavior by a bi-exponential decay function ( $\chi_R^2 = 1.10$ ), determining the interacting and non-  
46 interacting donor populations, resulting in a second decay time  $\tau_{DA} = 0.56$  ns (with a fixed decay  
47 time  $\tau_D = 2.94$  ns). Supplementary Tab. 1 summarizes the calculated fluorescence decay times of  
48 the donor phiYFP of different MSR-1 strains and statistical analysis. No significant change is  
49 observed between the fluorescence decay times  $\tau_D$  of MamJ-phiYFP and phiYFP + TagRFP657-  
50 MamK constructs. Thus, the presence of donor and acceptor fluorescent proteins alone is not  
51 sufficient for FRET events. However, in the presence of donor and acceptor fluorescent proteins  
52 fused to MamJ and MamK, the fluorescence decay times decrease significantly, but independent  
53 of the mechanical treatment (see also Supplementary Tab. 1).

54

## 55 **Energy transfer between MamJ-phiYFP and TagRFP657-MamK**

56 MamJ-phiYFP + TagRFP657-MamK was excited up to 4 times longer than MamJ-phiYFP or  
57 phiYFP + TagRFP657 to get sufficient counts for analyzing, indicating the successful energy  
58 transfer from the donor (phiYFP) in presence of the acceptor (TagRFP657). On the other hand,  
59 direct acceptor excitation with the same power at 635 nm did not result in increased acceptor

60 intensity in MamJ-phiYFP + TagRFP657-MamK due to the low quantum yield (0.1) of  
61 TagRFP657.

62

### 63 **Fitting procedure**

64 When applying time-resolved donor fluorescence measurements for studying FRET interactions,  
65 the measurements provide access to non-interacting and interacting fractions of the donor  
66 molecules – a benefit compared to intensity-based FRET recordings. Thus, the standard procedure  
67 is then divided into two steps<sup>1</sup>. First, the donor fluorescence decay time is recorded alone ( $\tau_D$ ) and  
68 subsequently in the presence of the acceptor ( $\tau_D$ ). Figure 1a shows the mono-exponential decay  
69 behavior of the donor alone (yielding  $\tau_D$  with  $\chi_R^2$ -values of 1.28, Supplementary Fig. S11). In the  
70 presence of donor and acceptor without interaction (control), the donor decay is not changed (still  
71 mono-exponential decay behavior), indicating the absence of influence of the fluorescent acceptor  
72 on the donor (see Supplementary Tab. S3, second row, added Supplementary Fig. S14).

73 However, in the case of a possible interaction between donor and acceptor, we clearly saw a multi-  
74 exponential donor fluorescence decay behavior (see Figure 1, Supplementary Fig. S14). Since we  
75 only detected donor molecules, the simplest way was to assume non-interacting and interacting  
76 donor molecules. Since non-interacting donor exhibited a mono-exponential decay time of 2.95 ns  
77 (which did not change under the presence of non-interaction acceptor), we fixed this value (only  
78 the time component, but not the fractional contribution). The second time component then  
79 corresponded to the interacting donor with reduced decay time originating from the energy transfer  
80 to the acceptor. Thus, bi-exponential decay fitting with only one fixed time component resulted  
81 then in the second time component (indicating the FRET efficiency) and in the fractional  
82 contribution (indicating the amount of interacting donor relative to all available donor molecules).

83 The determined IRF value (460 ps) falls within common range for this type of experimental setup  
84 (and is mainly determined by the SPAD-detector timing<sup>2</sup>. Theoretically, temporal resolutions down  
85 to 1/10 of the IRF can be reached, but in practice values of ½ of the IRF are realistic and  
86 distinguishable<sup>3</sup>. Thus, the time components we obtained could be analyzed with sufficient  
87 accuracy. In addition, the residuals and  $\chi_R^2$ -values indicated a reliable fitting procedure.

88

### 89 **Autofluorescence contribution**

90 A significant fluorescence signal under the chosen experimental conditions could not be observed  
91 in cells lacking the donor or acceptor (Supplementary Fig. S1c, e). Thus, autofluorescence was  
92 neglected.

93

### 94 **STED microscopy on MamK filaments**

95 After one STED round, we observed a certain structure, but the image had an insufficient quality  
96 (in term of counts). Accordingly, we waited 20 min in order to compare two consecutive STED  
97 images/ filaments. In the interval, the structure is likely reformed since, after 20 min of regeneration  
98 time, we observed again a fluorescence signal. We hypothesized the new fluorescent filament  
99 originated from treadmilling. We therefore concluded that the cells were still alive and that no  
100 significant phototoxicity took place.

101

### 102 **High FRET efficiencies, collection of photons**

103 Supplementary Tab. S3 shows that approximately 73 % to 81 % are interacting donor molecules.  
104 In general, not all donor molecules are able to interact with the acceptor<sup>1</sup>. However, upon the  
105 presence of a dynamic and intact MamK filament, or a stiff and static filament, the MamJ turnover  
106 remains constant<sup>4</sup>. Consequently, the dynamic behavior of MamJ is independent of MamK and is

107 proposed to only transiently interact with MamK. The half time of recovery of MamJ fusion  
108 proteins after photobleaching is approximately 10 s<sup>4</sup> and thus indicates a transient MamJ-MamK  
109 interaction < 20 s<sup>4</sup>. All photons were collected in an image obtained within approximately 50 s for  
110 the fluorescence decay fitting in the FLIM-FRET analysis, since faster point and line scans resulted  
111 in insufficient photon statistics. Consequently, short time interactions are averaged out for  
112 numerical FRET analysis. However, during the scanning process, interacting and non-interacting  
113 donor populations were visualized. On the one hand, free MamJ and MamK in the cytoplasm could  
114 result in this occurrence. On the other hand, under the assumption that the MamJ-MamK  
115 interactions are < 20 s, an inhomogeneous decay time distribution in a FLIM image recorded within  
116 50 s could be considered. Hence, this distribution would reflect the non-synchronized and transient  
117 interaction in a bacterium, as observed in the presented results.

118

### 119 **Normalization of TagRFP657 fluorescence intensities**

120 The images were normalized to maximum count value for comparison. Indeed, the counts refer as  
121 arbitrary unit to the recorded fluorescence intensity per pixel (Figure 4c: 0 - 84 counts per pixel,  
122 normalized to 84 counts = 1). Nevertheless, the changed intensities did not totally refer to  
123 bleaching, but also to slight changes in position and / or focus, to changed protein expression and/  
124 or distribution, and to variations due to the microscope setup, since we measured in sub-diffraction  
125 space. Still, the counts were high enough to produce a meaningful image.

126

### 127 **Plasmid construction**

128 Plasmids were constructed by amplifying the DNA fragments of interest with the Phusion High  
129 Fidelity DNA Polymerase (Thermo Scientific). Plasmid description and oligonucleotides are listed

130 in Supplementary Tab. 5 to 7, respectively (see below). Plasmids were introduced into *M.*  
131 *gryphiswaldense* by conjugation.

132 To generate pMT092, the *phiYFP* gene (Evrogen) was amplified with the oligonucleotides  
133 oMTN292 and oMTN293. Subsequently, the *phiYFP* fragment was *HindIII-BamHI* digested and  
134 ligated into the identically digested pMT082 vector.

135 To construct pMT093, the *TagRFP657* (Addgene) gene was amplified (oMTN294-295) and further  
136 cloned into the vector pMT080 under the control of the *mamAB* operon promoter ( $P_{mamAB}$ ) using  
137 the restriction sites *NdeI-EcoRI*.

138 Plasmid pMT094 was created by amplifying the *mamK* gene (oMTN045-296) and subsequently  
139 cloned into pMT093 by using the *HindIII-BamHI* restriction sites.

140 For creation of pMT095, the *TagRFP657-mamK* fragment was amplified (oMTN297-298) and  
141 *BamHI-XhoI* digested to be cloned into identically digested pMT092 vector.

142 For construction of pMT107, the *phiYFP+TagRFP657-mamK* fragment was amplified  
143 (oMTN353-355) and cloned into pMT094 using the *NdeI-BamHI* restriction sites.

144 Finally, to construct pMT108, the vector pMT107 was *BamHI-XhoI* digested. Subsequently, blunt  
145 ends were generated and further re-ligated (in addition see Supplementary Tab. 5 - 7).

146 The fusions MamJ-*phiYFP*, TagRFP657-MamK, and MamJ-*phiYFP* + TagRFP657-MamK  
147 rescued the phenotypes of the  $\Delta mamJ$ ,  $\Delta mamK$ , and  $\Delta mamJK$  strains, respectively, which  
148 exhibited wild type-like magnetosomes chains (data not shown). This means that the fusions are  
149 functional.

150

151 **Supplementary figures**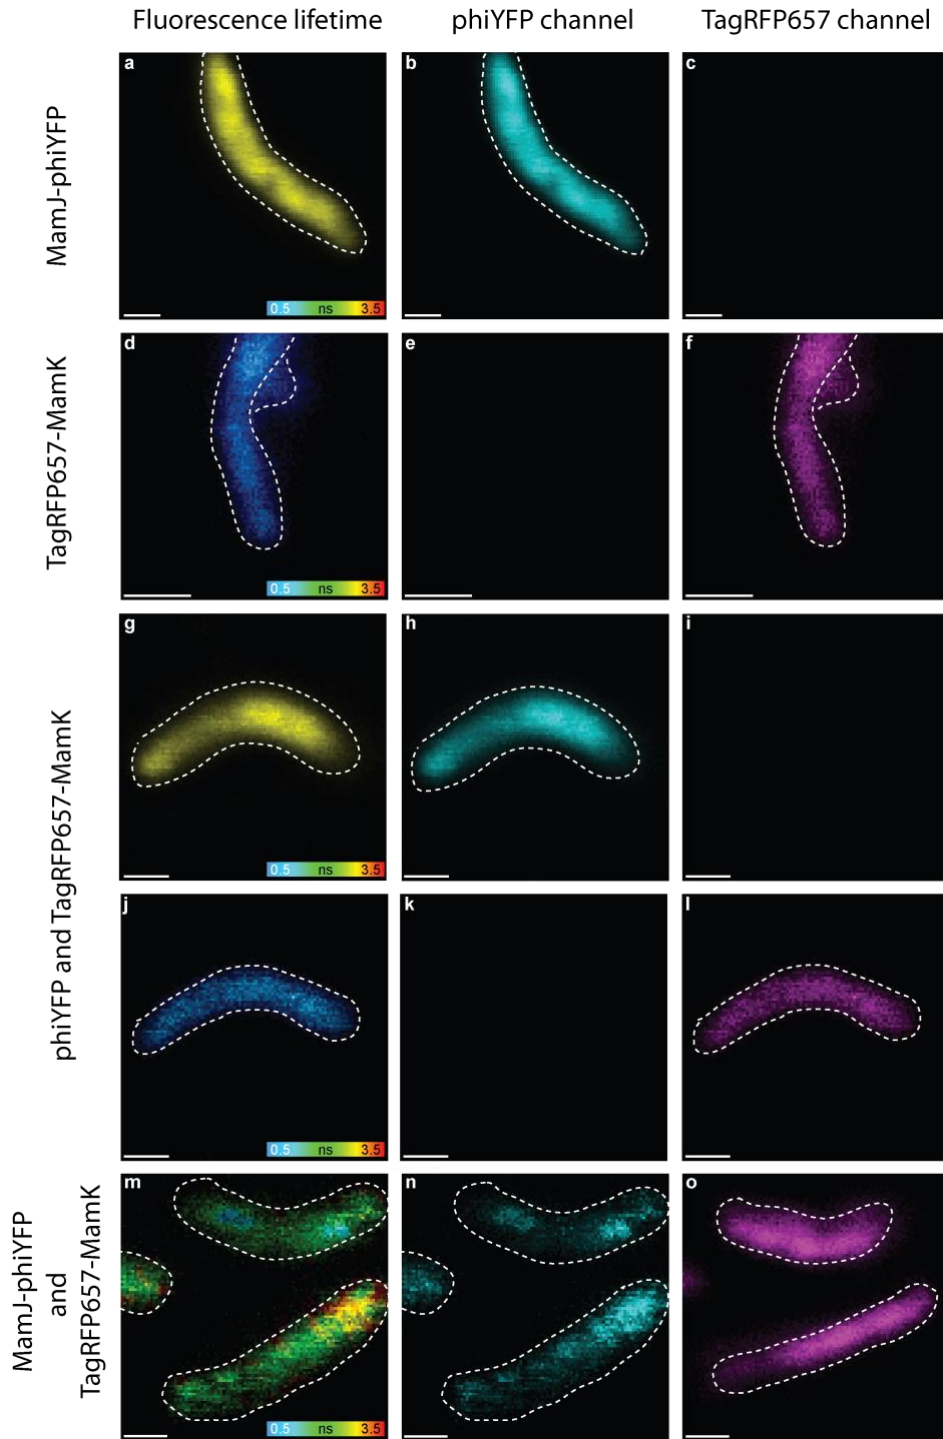

152

153 **Supplementary Figure S1: Fluorescence lifetime and fluorescence intensity images of MamJ-**  
 154 **phiYFP, TagRFP657-MamK and MamJ-phiYFP + TagRFP657-MamK in the phiYFP**



155 **channel and TagRFP657 channel.** The first row shows MSR-1 cells with only MamJ-phiYFP (a-  
156 c) with the fluorescence lifetime image of the phiYFP-channel colored in yellow (a) indicating a  
157 long donor decay time. The fluorescence intensity image is colored in cyan (b). The second row  
158 illustrates MSR-1 cells with only TagRFP657-MamK (d-f) with the fluorescence lifetime image of  
159 the TagRFP657-channel colored in blue (d) indicating a short acceptor decay time. The  
160 fluorescence intensity image is colored in purple (f). The third and fourth row shows MSR-1 cells  
161 with TagRFP657-MamK and phiYFP (g-l) with the fluorescence lifetime image of the phiYFP-  
162 channel colored in yellow (g) indicating a long donor decay time and with the fluorescence lifetime  
163 image of the TagRFP657-channel colored in blue (j) indicating a short acceptor decay time. The  
164 fluorescence intensity of phiYFP is colored in cyan (h) and the fluorescence intensity of  
165 TagRFP657 is colored in purple (l). The fifth row shows MSR-1 cells with MamJ-phiYFP and  
166 TagRFP657-MamK (m-o) with the fluorescence lifetime image of the phiYFP-channel (m), in  
167 which green colors indicate the reduced donor decay time due to energy transfer. The fluorescence  
168 intensity of phiYFP is colored in cyan (n) and the fluorescence intensity of TagRFP657 is colored  
169 in purple (o).

170

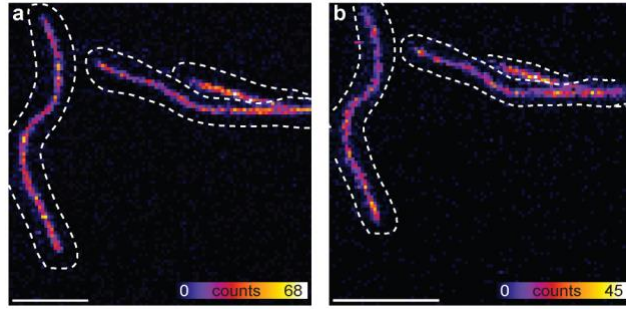

171

172 Supplementary Figure S2: **STED images of MSR-1 cells expressing MamJ-**  
173 **phiYFP + TagRFP657-MamK.** The fluorescence intensity of TagRFP657 was recorded,  
174 indicating the filament TagRFP657-MamK. First image scan (a) second image scan after 20 min  
175 regeneration period (b). Scale bar: 1  $\mu\text{m}$ .

176

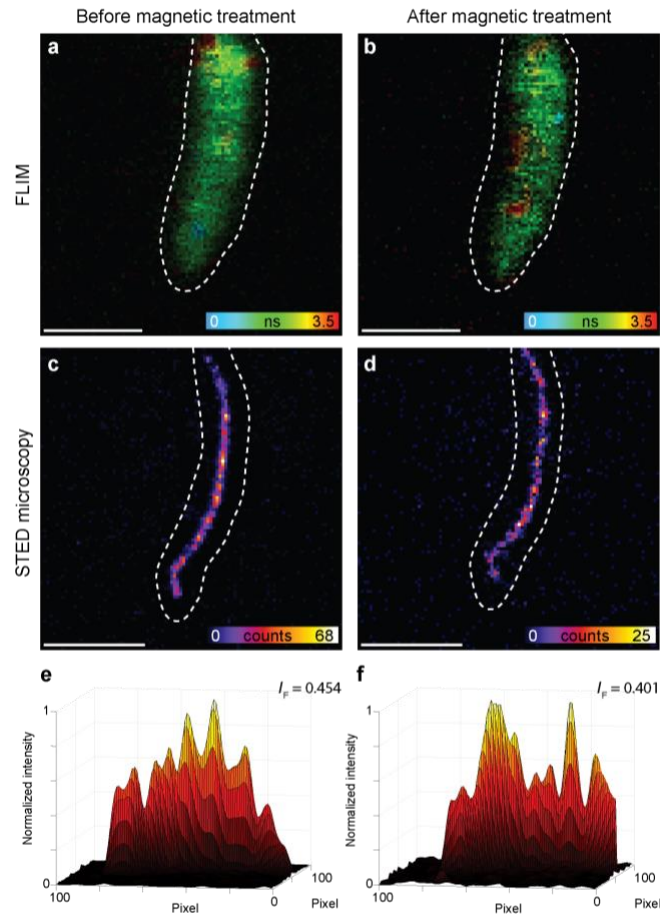

177

178 Supplementary Figure S3: *In vivo* FLIM-FRET and STED experiments on MSR-1 cells before  
 179 and after magnetic field rotation. FLIM images (a, b) and STED images (c, d) of MSR-1 cells  
 180 with MamJ-phiYFP + TagRFP657-MamK before (a, c) and after (b, d) applying a magnetic field.  
 181 (e, f) Corresponding 3D surface intensity plots of the STED images. For a better illustration, we  
 182 normalized the intensity and used a Gaussian filter.

183

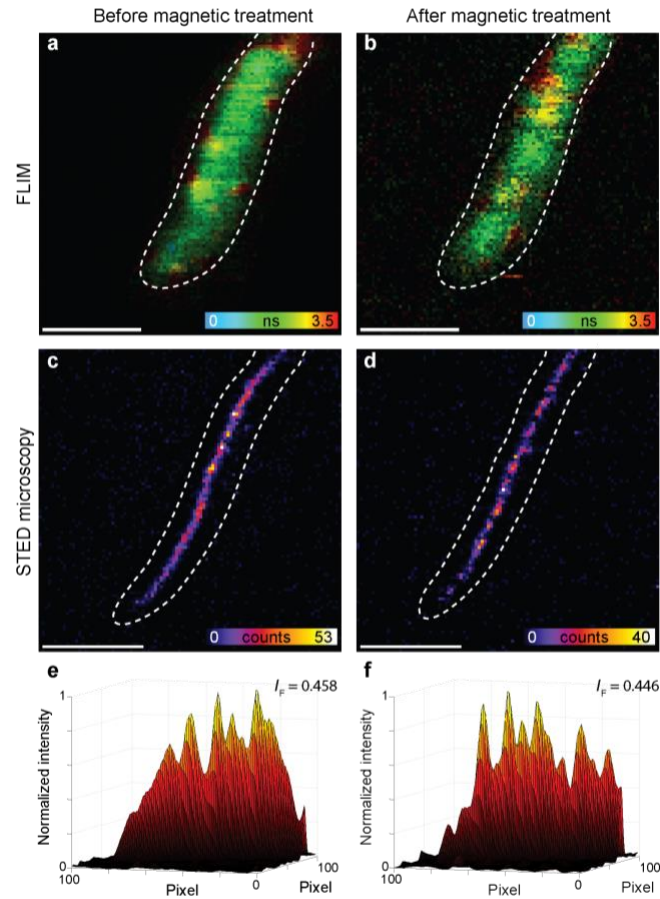

184

185 Supplementary Figure S4: *In vivo* FLIM-FRET and STED experiments on MSR-1 cells before  
 186 and after magnetic field rotation. FLIM images (a, b) and STED images (c, d) of MSR-1 cells  
 187 with MamJ-phiYFP + TagRFP657-MamK before (a, c) and after (b, d) applying a magnetic field.  
 188 (e, f) Corresponding 3D surface intensity plots of the STED images. For a better illustration, we  
 189 normalized the intensity and used a Gaussian filter.

190

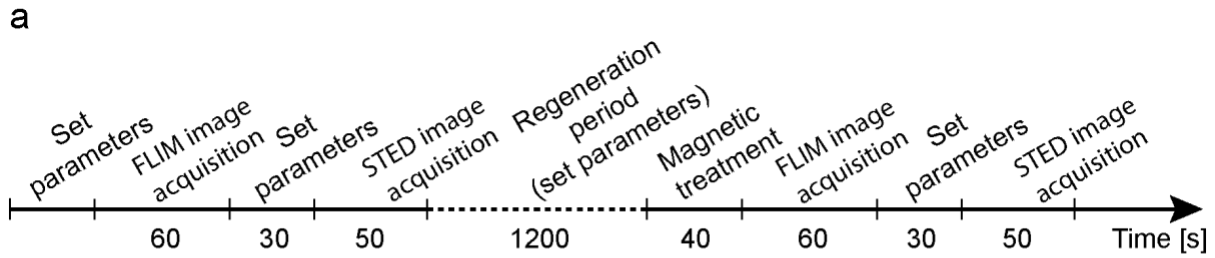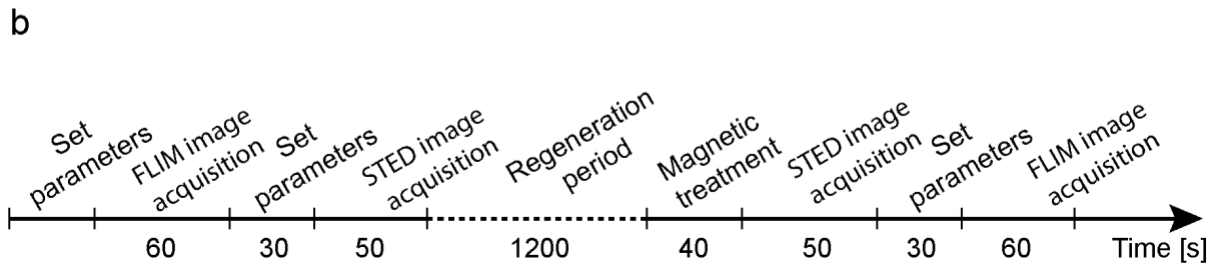

191

192 **Supplementary Figure S5: Timeline of the image acquisition.** (a) The FLIM image recording time  
 193 is approx. 60 s followed by approx. 50 s for the STED imaging. In between is a short break of  
 194 approx. 30 s to change the setting for the next measurement. This procedure is repeated after a  
 195 20 min regeneration period and the magnetic treatment. (b) Immediately after the regeneration  
 196 period and the magnetic treatment, the STED image was recorded followed by the FLIM image  
 197 acquisition.

198 The FRET efficiency did not change after magnetic treatment. Therefore, we changed the order of  
 199 the image acquisition to reduce the time for the *de novo* synthesis of MamK.

200

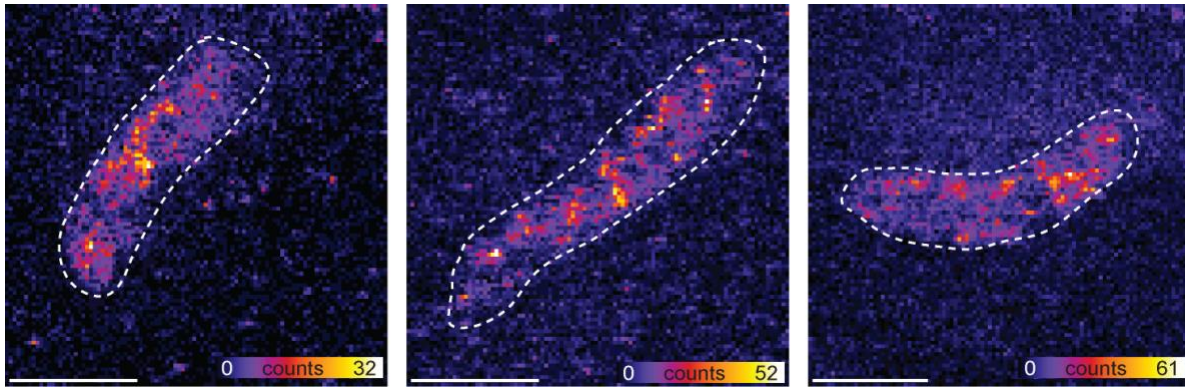

201

202 **Supplementary Figure S6: STED images of filament fragments after rotating a magnetic field**  
203 **and chemical fixing of the cells with 4% PFA. Scale bar: 1 μm.**

204

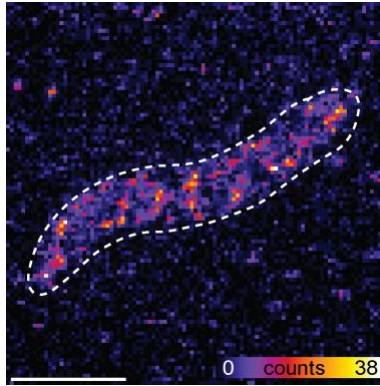

205

206 **Supplementary Figure S7: STED images of filament fragments after rotating a magnetic field**  
207 **and chemical fixing of the cells with 4% PFA. Scale bar: 1  $\mu$ m.**

208

209

210

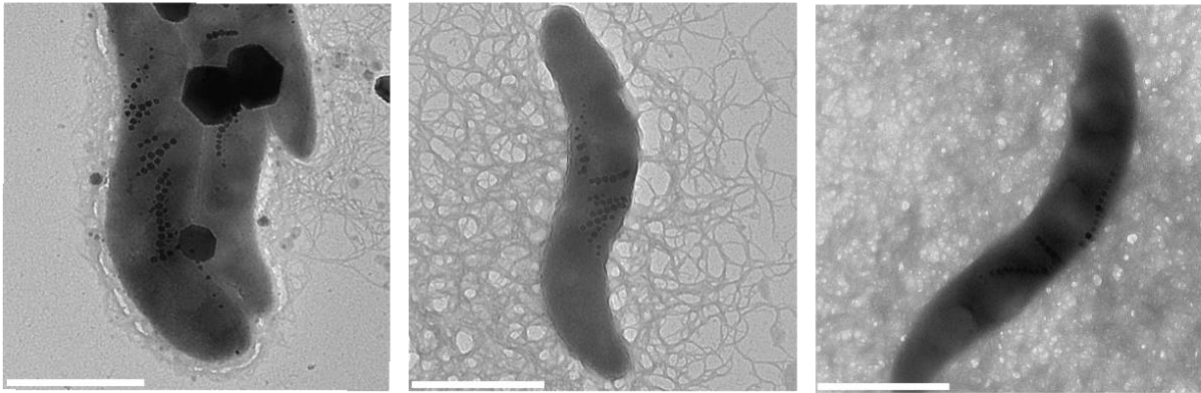

211

212 **Supplementary Figure S8: TEM images of chain fragments after rotating a magnetic field and**  
213 **chemical fixing of the cells with 4% PFA. Scale bar: 1  $\mu$ m.**

214



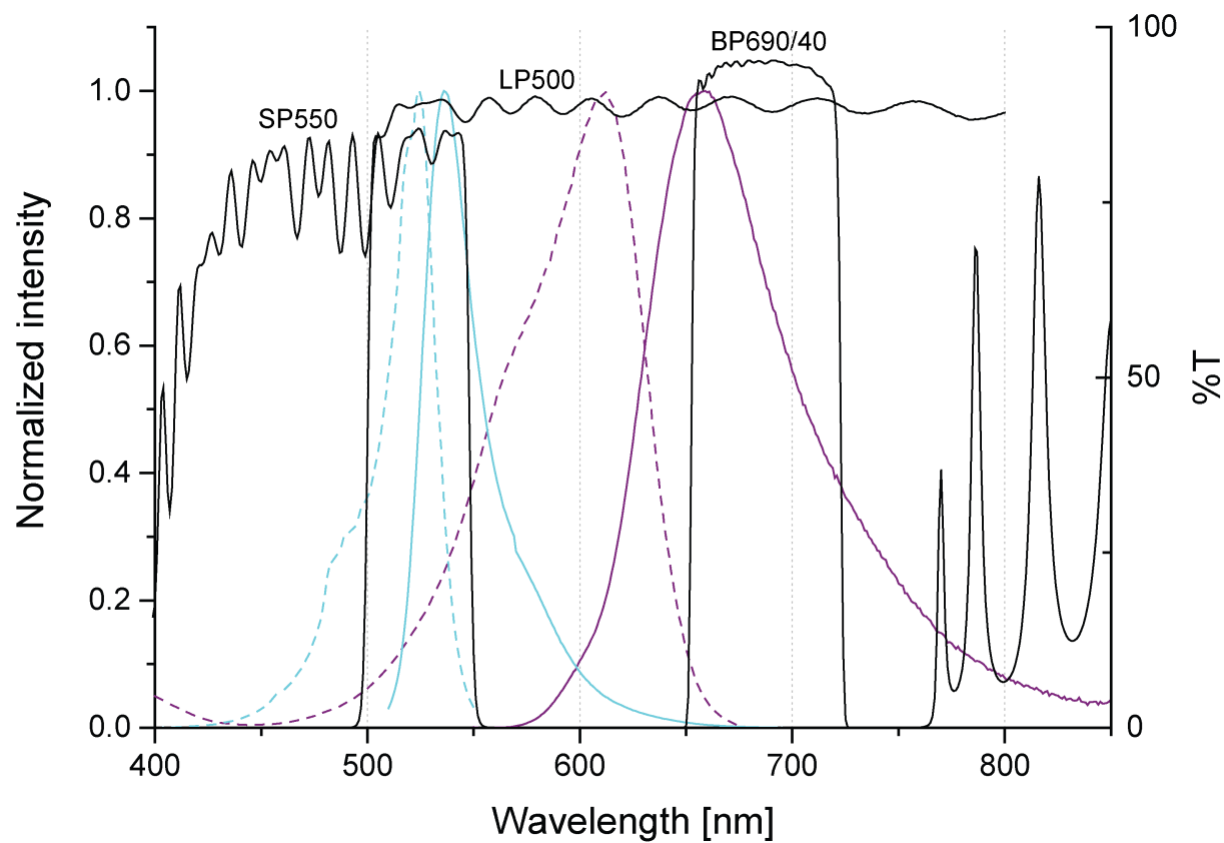

215  
216 **Supplementary Figure S9: Absorption (dashed lines) and emission (solid lines) of phiYFP**  
217 **(cyan) and TagRFP657 (purple) as well as transmission curves of the chosen filters (black)**  
218 **for FLIM-FRET and STED experiments.**

219

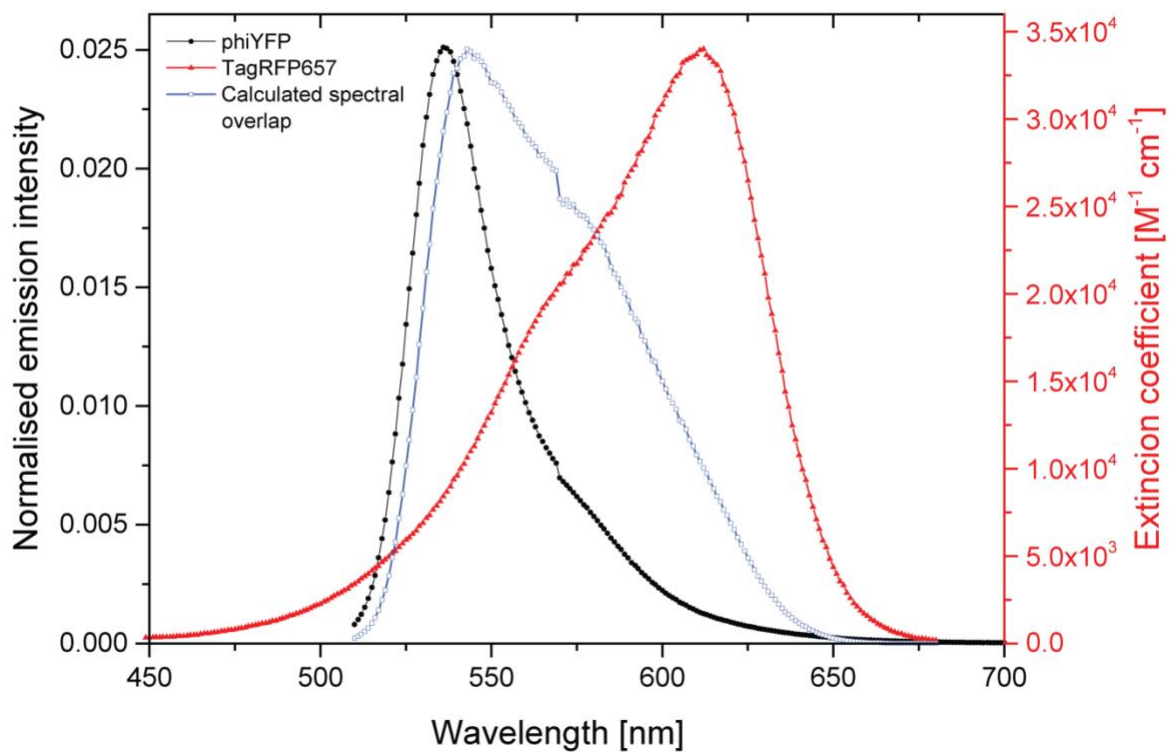

220  
221 Supplementary Figure S10: Area-normalized emission spectrum of phiYFP (black), molar  
222 absorption spectrum of TagRFP657 (red) and resulting overlap function indicating the  
223 spectral overlap integral  $J(\lambda)$ .

224

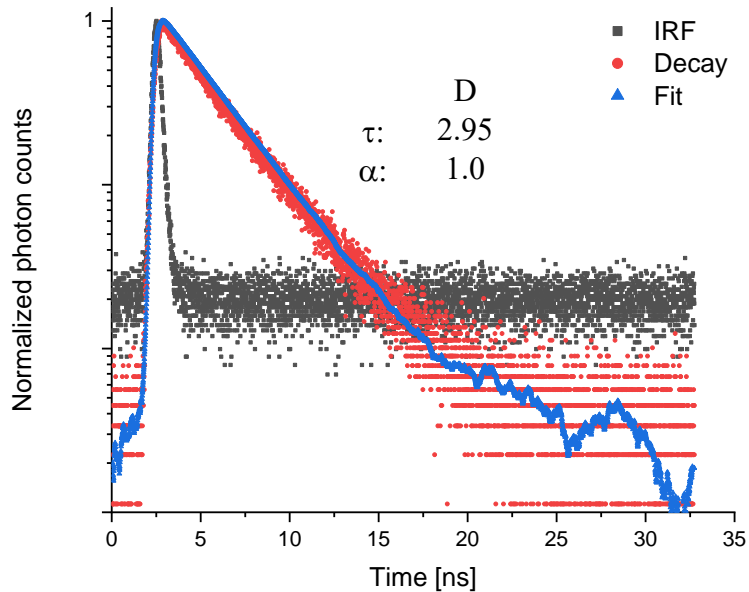

225

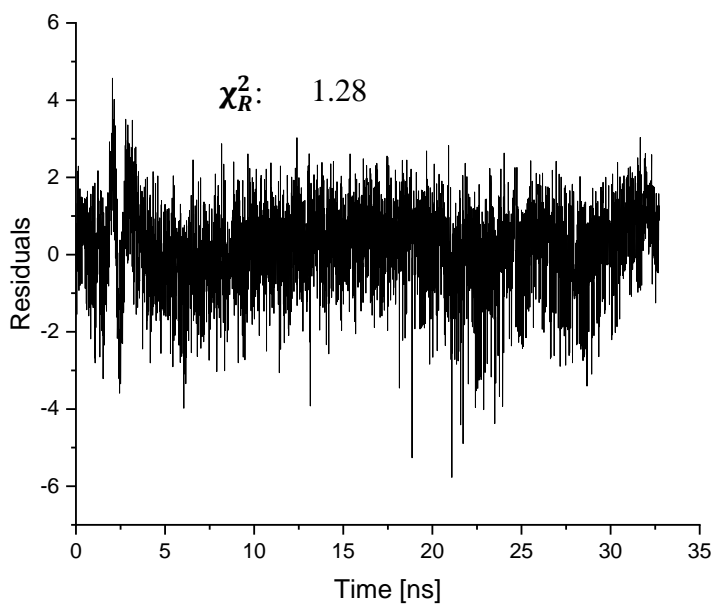

226

227 Supplementary Figure S11: *In vivo* FLIM-FRET analysis in MSR-1 cells with MamJ-phiYFP.

228 A representative phiYFP (donor) fluorescence decay curve was measured by time-correlated  
 229 single-photon counting (TCSPC) in MSR-1 expressing MamJ-phiYFP (red data points). For  
 230 MamJ-phiYFP, the data was fitted to a single-exponential deconvolution fitting model (blue),

231 yielding the decay time  $\tau_D = 2.95$  ns. The instrument response function (IRF) is shown in grey. The  
232 amplitude ( $\alpha$ ) is 1.0. The corresponding  $\chi_R^2$  is displayed below (1.28).

233

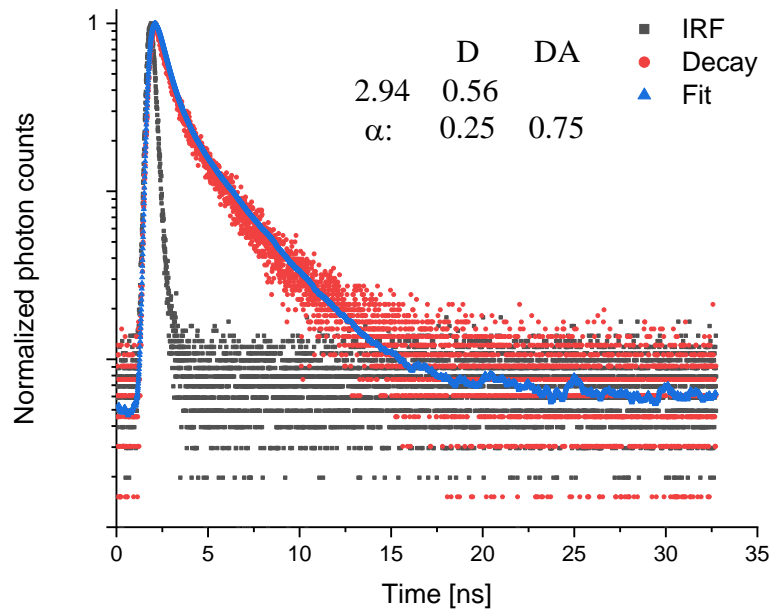

234

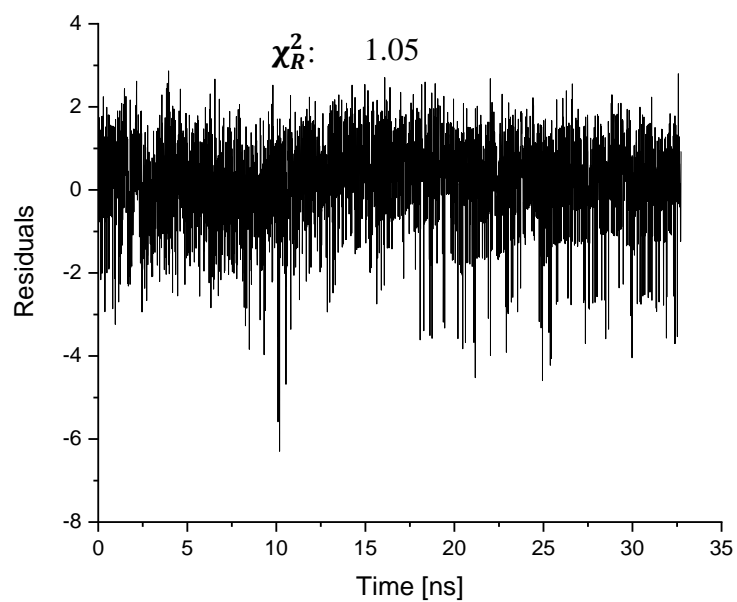

235

236 Supplementary Figure S12: *In vivo* FLIM-FRET analysis in MSR-1 cells with MamJ-phiYFP  
 237 and TagFRP657-MamK. A representative fluorescence decay curve was measured by time-  
 238 correlated single-photon counting (TCSPC) in MSR-1 expressing MamJ-phiYFP and TagRFP657-

239 MamK (red data points). The data was fitted to a bi-exponential deconvolution fitting model (blue  
240 line), yielding the decay time  $\tau_D = 2.94$  ns and an amplitude ( $\alpha_D$ ) of 0.25 along with  $\tau_{DA} = 0.56$  ns  
241 and an amplitude ( $\alpha_{DA}$ ) of 0.75. The instrument response function (IRF) is shown in grey. The  
242 corresponding  $\chi_R^2$  is displayed below (1.05).

243

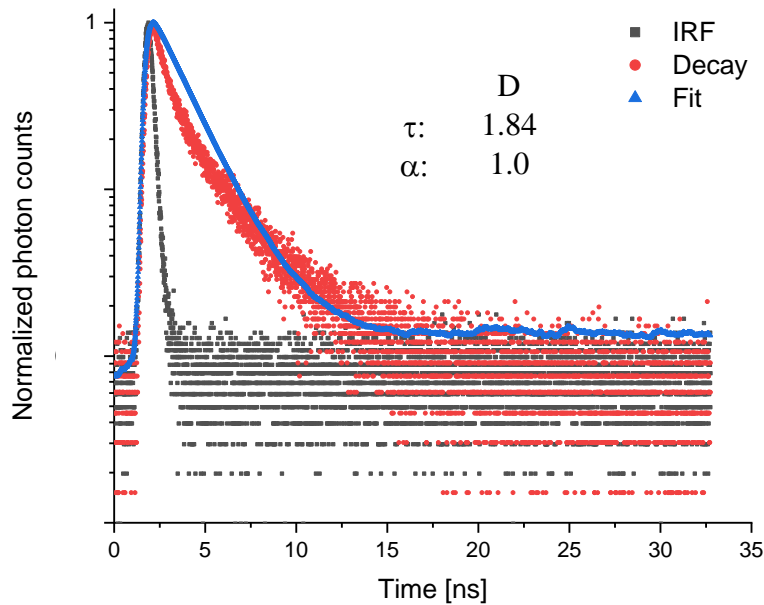

244

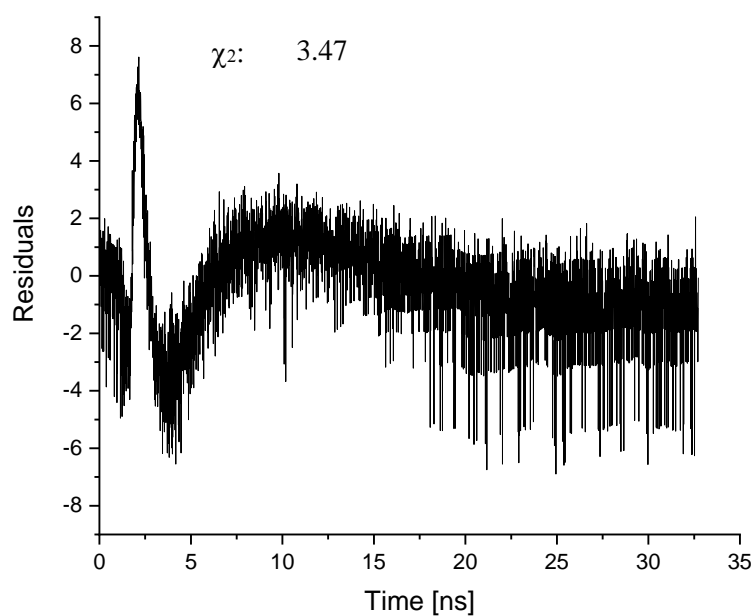

245

246 Supplementary Figure S13: *In vivo* FLIM-FRET analysis in MSR-1 cells with MamJ-phiYFP  
247 and TagFRP657-MamK. A representative fluorescence decay curve measured by time-correlated  
248 single-photon counting (TCSPC) in MSR-1 expressing MamJ-phiYFP and TagRFP657-MamK

249 (red data points). The data was fitted to a single-exponential deconvolution fitting model (blue  
250 line), yielding the decay time  $\tau_D = 1.84$  ns and an amplitude ( $\alpha_D$ ) of 1.0. The instrument response  
251 function (IRF) is shown in grey. The corresponding  $\chi_R^2$  is displayed below (3.47).

252

253 The fitting of the decay curve using a bi-exponential deconvolution fitting model resulted in a  
254 better  $\chi_R^2$ . Thus we used the bi-exponential deconvolution fitting model for MSR-1 cells expressing  
255 MamJ-phiYFP and TagRFP657-MamK.

256

257



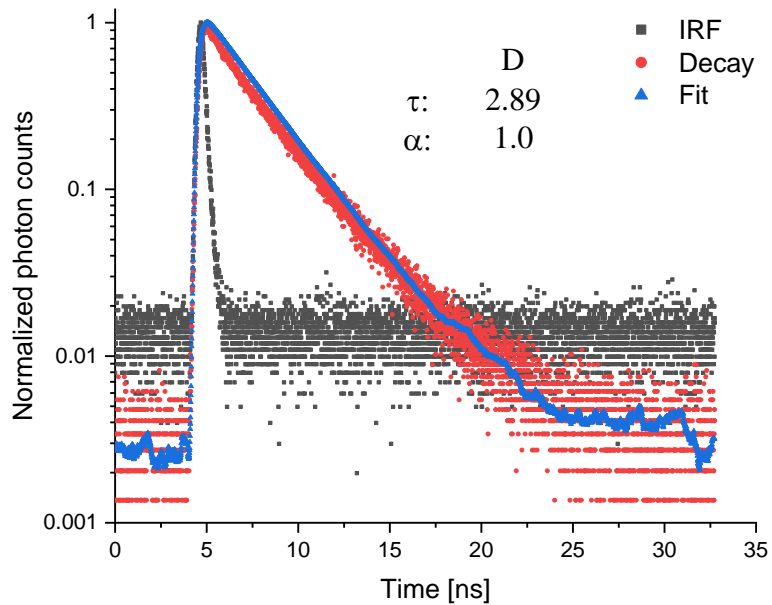

258

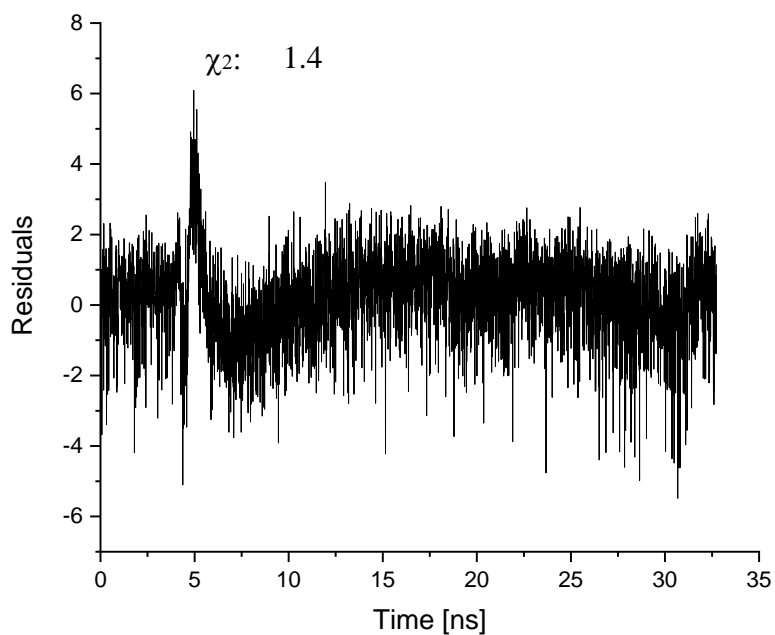

259

260 Supplementary Figure S14: *In vivo* FLIM-FRET analysis in MSR-1 cells with phiYFP and  
 261 TagFRP657-MamK. A representative fluorescence decay curves measured by time-correlated  
 262 single-photon counting (TCSPC) in MSR-1 expressing phiYFP and TagRFP657-MamK (red data

263 points). The data was fitted to a single-exponential deconvolution fitting model (blue), yielding the  
264 decay time  $\tau_D = 2.89$  ns and an amplitude ( $\alpha_D$ ) of 1.0. The instrument response function (IRF) is  
265 shown in grey. The corresponding  $\chi_R^2$  is displayed below (1.4).

266

267 **Supplementary tables**

268 Supplementary Table S1: **Full-width at half maximum (FWHM) of confocal and STED**  
 269 **fluorescence image of TagRFP657-MamK filaments.**

| Bacterium                | Confocal [nm] | STED [nm] |
|--------------------------|---------------|-----------|
| Figure 1d                | 264           | 60        |
| Supplementary Figure S4c | 220           | 66        |
| Supplementary Figure S4c | 217           | 63        |
| 4*                       | 233           | 84        |
| 5*                       | 200           | 75        |
| 6*                       | 261           | 54        |
| 7*                       | 225           | 77        |
| 8*                       | 202           | 102       |
| 9*                       | 203           | 73        |
| 10*                      | 207           | 80        |

\*Images are not shown.

270

271 The FWHM was determined at the center of the cell. The mean FWHM of the confocal  
 272 fluorescence images of MamK-TagRFP657 is  $223 \pm 23$  nm and was significantly reduced  
 273 to  $73 \pm 24$  nm in STED fluorescence images ( $P < 2 \cdot 10^{-7}$ ).

274

275 Supplementary Table S2: **Determined area of the MamK filament before and after a 20 minute**  
 276 **regeneration period.**

| Filament                | $I_F$ before magnetic treatment | $I_F$ after magnetic treatment |
|-------------------------|---------------------------------|--------------------------------|
| Supplementary Figure S2 | 0.533                           | 0.501                          |
| Supplementary Figure S2 | 0.369                           | 0.366                          |
| Supplementary Figure S2 | 0.591                           | 0.522                          |
| 4*                      | 0.477                           | 0.442                          |
| 5*                      | 0.527                           | 0.397                          |
| 6*                      | 0.49                            | 0.491                          |
| 7*                      | 0.486                           | 0.393                          |
| 8*                      | 0.376                           | 0.337                          |
| 9*                      | 0.470                           | 0.479                          |
| 10*                     | 0.446                           | 0.429                          |

\*Images of the filaments are not shown.

277

278 Supplementary Table S3: **Fluorescence decay times of the donor phiYFP, FRET efficiencies**  
 279 **(*E*) and donor-acceptor distances (*r*) in MSR-1 strains, together with their standard**  
 280 **deviations (SD) as well as number of bacteria and cultures and statistical analysis.**

| Constructs                                                          | $\tau_D \pm SD$<br>[ns] # | $\tau_{DA} \pm SD$<br>[ns] # | Statistical<br>analysis §  | <i>E</i> ± SD<br>[%] | <i>r</i> ± SD<br>[nm] | Bacteria | Indepen-<br>dent<br>cultures |
|---------------------------------------------------------------------|---------------------------|------------------------------|----------------------------|----------------------|-----------------------|----------|------------------------------|
| MamJ-phiYFP                                                         | 2.94 ± 0.07<br>(1.00)     |                              | n.s.<br>***<br>***<br>n.s. |                      |                       | 9        | 1                            |
| phiYFP +<br>TagRFP657-MamK                                          | 2.97 ± 0.08<br>(1.00)     |                              |                            | 34                   | 3                     |          |                              |
| MamJ-phiYFP +<br>TagRFP657-MamK<br>(before mechanical<br>treatment) | 2.94<br>(0.27 ± 0.10)     | 0.56 ± 0.13<br>(0.73 ± 0.10) |                            | 81 ± 4               | 3.6 ± 0.2             | 72       | 7                            |
| MamJ-phiYFP +<br>TagRFP657-MamK<br>(after mechanical<br>treatment)  | 2.94<br>(0.19 ± 0.10)     | 0.46 ± 0.17<br>(0.81 ± 0.10) |                            | 84 ± 5               | 3.4 ± 0.2             | 45       | 5                            |

281  
 282 # Mean amplitudes  $\alpha_i \pm SD$  of the respective decay time components  $\tau_i$  of single- and bi-exponential decay analyses  
 283 are presented in parentheses.

284 § Due to non-normality (D'Agostino and Pearson omnibus normality test,  $P > 0.05$ ) data were analyzed using a  
 285 Kruskal-Wallis test followed by Dunn's multiple comparison tests as indicated. n.s.: non-significant, \*\*\*  $P < 0.001$ .

286

287 Supplementary Table S4: **Determined area of the MamK filament before and after applying a**  
 288 **magnetic torque.**

| Filament                       | $I_F$ before magnetic treatment | $I_F$ after magnetic treatment |
|--------------------------------|---------------------------------|--------------------------------|
| Figure 3c and d                | 0.564                           | 0.483                          |
| Supplementary Figure S3a and d | 0.472                           | 0.475                          |
| Supplementary Figure S4a and d | 0.471                           | 0.358                          |
| 4*                             | 0.519                           | 0.262                          |
| 5*                             | 0.390                           | 0.358                          |
| 6*                             | 0.317                           | 0.270                          |
| 7*                             | 0.472                           | 0.318                          |
| 8*                             | 0.576                           | 0.403                          |
| 9*                             | 0.410                           | 0.338                          |
| 10*                            | 0.380                           | 0.341                          |

\*Images of the filaments are not shown.

289

290

291 Supplementary Table S5: **Bacterial strains generated and used in this study.**

| Strain*                                                  | Genotype or characteristics                                                                                                                                                                           | Reference or source          |
|----------------------------------------------------------|-------------------------------------------------------------------------------------------------------------------------------------------------------------------------------------------------------|------------------------------|
| <i>M. gryphiswaldense</i>                                |                                                                                                                                                                                                       |                              |
| MSR WT                                                   | Wild-type MSR-1 R3/S1 (Rif <sup>r</sup> , Sm <sup>R</sup> ).                                                                                                                                          | 5                            |
| $\Delta mamJ$                                            | $\Delta mamJ$                                                                                                                                                                                         | 6                            |
| $\Delta mamK$                                            | $\Delta mamK$                                                                                                                                                                                         | 7                            |
| $\Delta mamJK$                                           | $\Delta mamJK$                                                                                                                                                                                        | 4                            |
| MamJ-phiYFP                                              | MSR WT, conjugated with pMT092, K <sub>MR</sub>                                                                                                                                                       | This work                    |
| TagRFP657-MamK                                           | MSR WT, conjugated with pMT094, K <sub>MR</sub>                                                                                                                                                       | This work                    |
| MamJ-<br>phiYFP + TagRFP657-<br>MamK                     | MSR WT, conjugated with pMT095, K <sub>MR</sub>                                                                                                                                                       | This work                    |
| phiYFP + TagRFP657-<br>MamK                              | MSR WT, conjugated with pMT107, K <sub>MR</sub>                                                                                                                                                       | This work                    |
| phiYFP                                                   | MSR WT, conjugated with pMT108, K <sub>MR</sub>                                                                                                                                                       | This work                    |
| $\Delta mamJ$ + MamJ-phiYFP                              | $\Delta mamJ$ , conjugated with pMT092, K <sub>MR</sub>                                                                                                                                               | This work                    |
| $\Delta mamK$ + TagRFP657-<br>MamK                       | $\Delta mamK$ , conjugated with pMT094, K <sub>MR</sub>                                                                                                                                               | This work                    |
| $\Delta mamJK$ +<br>MamJ-<br>phiYFP + TagRFP657-<br>MamK | $\Delta mamJK$ , conjugated with pMT095, K <sub>MR</sub>                                                                                                                                              | This work                    |
| <i>E. coli</i>                                           |                                                                                                                                                                                                       |                              |
| DH5 $\alpha$                                             | Host for cloning.<br>F- $\phi 80lacZ\Delta M15 \Delta(lacZYA-argF)$ U169 <i>recA1 endA1 hsdR17</i><br>(rK <sup>-</sup> , mK <sup>+</sup> ) <i>phoA supE44 <math>\lambda</math>-thi-1 gyrA96 relA1</i> | Invitrogen                   |
| WM3064                                                   | Host for cloning and conjugation.<br><i>thrB1004 pro thi rpsL hsdS lacZ\Delta M15 RP4-1360 <math>\Delta(araBAD)567</math></i><br><i><math>\Delta dapA1341::[erm pir (wt)]</math></i>                  | W. Metcalf,<br>(unpublished) |

293 Supplementary Table S6: **Plasmids generated and used in this study.**

| Plasmid    | Relevant characteristics                                                                                                 | Reference or source |
|------------|--------------------------------------------------------------------------------------------------------------------------|---------------------|
| pBBR1-MCS2 | Replicative backbone vector for <i>in trans</i> gene expression in MSR. <i>oriT</i> , <i>mob</i> , <i>Km<sup>R</sup></i> | 8                   |
| pMT080     | pBBR1-MCS2 based vector, <i>Km<sup>R</sup></i> ,<br><i>P<sub>mamAB-<math>\alpha</math>-helix</sub></i> (linker)          | 4                   |
| pMT082     | pBBR1-MCS2 based vector, <i>Km<sup>R</sup></i> ,<br><i>P<sub>mamAB-mamJ-dendra2</sub></i>                                | 4                   |
| pMT092     | pMT082 derivative, <i>P<sub>mamAB-mamJ-phiYFP</sub></i>                                                                  | This work           |
| pMT093     | pMT080 derivative, <i>P<sub>mamAB-RFP657-linker</sub></i>                                                                | This work           |
| pMT094     | pMT093 derivative, <i>P<sub>mamAB-TagRFP657-mamK</sub></i>                                                               | This work           |
| pMT095     | pMT092 derivative, <i>P<sub>mamAB-mamJ-phiYFP_TagRFP657-mamK</sub></i>                                                   | This work           |
| pMT107     | pMT095 derivative, <i>P<sub>mamAB-phiYFP_TagRFP657-mamK</sub></i>                                                        | This work           |
| pMT108     | pMT107 derivative, <i>P<sub>mamAB-phiYFP</sub></i>                                                                       | This work           |

294



295 Supplementary Table S7: **Oligonucleotides used in this work.**

| Name    | Sequence 5'→3'                                                                   | Remarks                                                                  |
|---------|----------------------------------------------------------------------------------|--------------------------------------------------------------------------|
| oMTN045 | agacta <b>GGATCCT</b> CACTGACCGGAAACGTCACCAAGC                                   | Overhang, <i>Bam</i> HI                                                  |
| oMTN292 | agacta <b>AAGCTT</b> ATGAGCAGCGGCGCCCTGCT                                        | Overhang, <i>Hind</i> III                                                |
| 0MTN293 | agacta <b>GGATCCT</b> CACAGGTAGGTCTTGCGGCAATCC                                   | Overhang, <i>Bam</i> HI                                                  |
| oMTN294 | agacta <b>CATATG</b> AGCGAGCTGATTACCGAGAACATGC                                   | Overhang, <i>Nde</i> I                                                   |
| oMTN295 | agacta <b>GAATTC</b> ATTTCAGCTTGTGCCCCAGTTTGCTAGG                                | Overhang, <i>Eco</i> RI                                                  |
| oMTN296 | agacta <b>AAGCTT</b> ATGAGTGAAGGTGAAGGCCAGGCC                                    | Overhang, <i>Hind</i> III                                                |
| oMTN297 | agacta <b>GGATCC</b> CctgaccctgaattaaggacaacagcgATGAGCGAGCTGATTACC<br>GAGAACATGC | Overhang, <i>Bam</i> HI,<br>Lowercases: <i>mamC</i><br>intergenic region |
| oMTN298 | agacta <b>CTCGAGT</b> CACTGACCGGAAACGTCACCAAGCTG                                 | Overhang, <i>Xho</i> I                                                   |
| oMTN353 | agacta <b>CATATG</b> AGCAGCGGCGCCCTGCT                                           | Overhang, <i>Nde</i> I                                                   |
| oMTN355 | agacta <b>CTCGAGT</b> CACTGACCGGAAACGTCACCAAGC                                   | Overhang, <i>Xho</i> I                                                   |

296

297 **References**

- 298 1. Becker, W. Fluorescence lifetime imaging--techniques and applications. *J. Microsc.* **247**,  
299 119–36 (2012).
- 300 2. Jahn, K., Buschmann, V. & Hille, C. Simultaneous Fluorescence and Phosphorescence  
301 Lifetime Imaging Microscopy in Living Cells. *Sci. Rep.* **5**, 14334 (2015).
- 302 3. Wahl, M. & Orthaus-Müller, S. Time tagged time-resolved fluorescence data collection in  
303 life science. *Tech. note, PicoQuant GmbH* (2014).
- 304 4. Toro-Nahuelpan, M. *et al.* Segregation of prokaryotic magnetosomes organelles is driven  
305 by treadmilling of a dynamic actin-like MamK filament. *BMC Biol.* **14**, 88 (2016).
- 306 5. Schultheiss, D. & Schüler, D. Development of a genetic system for *Magnetospirillum*  
307 *gryphiswaldense*. *Arch. Microbiol.* **179**, 89–94 (2003).
- 308 6. Scheffel, A. *et al.* An acidic protein aligns magnetosomes along a filamentous structure in  
309 magnetotactic bacteria. *Nature* **440**, 110–114 (2006).
- 310 7. Katzmann, E., Scheffel, A., Gruska, M., Plitzko, J. M. & Schüler, D. Loss of the actin-like  
311 protein MamK has pleiotropic effects on magnetosome formation and chain assembly in  
312 *Magnetospirillum gryphiswaldense*. *Mol. Microbiol.* **77**, 208–224 (2010).
- 313 8. Kovach, M. E., Phillips, R. W., Elzer, P. H., Roop, R. M. & Peterson, K. M. pBBR1MCS:  
314 a broad-host-range cloning vector. *Biotechniques* **16**, 800–2 (1994).
- 315
